# Supplementary material
Source: Elsevier journal article supplement (https://www.sciencedirect.com/science/article/pii/S2255553617302021)
Supplement: mmc1 [file S2255553617302021:mmc1.docx]

**Arquivo Complementar 1**

**PESQUISA SOBRE DOR E USO DE MÍDIA ELETRÔNICA**

Caro aluno, convidamos você a responder este questionário sobre dor nos músculos e uso de dispositivos eletrônicos.

Muito obrigado por sua cooperação.

**IDENTIFICAÇÃO**

Escolaridade:

Ensino fundamental:

- 5º ANO
- 6º ANO
- 7º ANO
- 8º ANO
- 9º ANO

Ensino médio:

- 1º ANO
- 2º ANO
- 3º ANO

Nascimento: ___ / ___ / ___

Sexo: □ Masculino □ Feminino

**ATIVIDADE FÍSICA**

1. Você participa das aulas de educação física em sua escola? □ Não □ Sim
2. Você pratica qualquer outro esporte regularmente? Qualquer exercício como ginástica, andar de bicicleta, skate, dança, natação, escalada, artes marciais, fisiculturismo, etc.

□ Não □ Sim

Qual exercício você pratica? E quantos dias na semana você pratica cada um deles?

|  |  | Atividade Física | Vezes por semana | | | | | | | | | |  |
| --- | --- | --- | --- | --- | --- | --- | --- | --- | --- | --- | --- | --- | --- |
|  |  |  | 1 | 2 | | | 3 | | 4 | 5 | 6 | 7 |  |
|  |  |  | 1 | 2 | | | 3 | | 4 | 5 | 6 | 7 |  |
|  |  |  | 1 | 2 | | | 3 | | 4 | 5 | 6 | 7 |  |
|  |  |  | 1 | 2 | | | 3 | | 4 | 5 | 6 | 7 |  |
|  |  |  | 1 | 2 | | | 3 | | 4 | 5 | 6 | 7 |  |
|  |  |  |  |  |  |  | |  |  |  |  |  |  |

**USO DE COMPUTADOR (DESKTOP, NOTEBOOK OU LAPTOP, TABLET)**

1. Quais dos seguintes dispositivos eletrônicos você tem em casa (você pode marcar mais de uma opção):

□ Desktop

□ Internet

□ Laptop

□ Console de videogame (Nintendo, Playstation, WII, XBOX)

□ Tablet (iPad, etc.)

□ Videogame portátil (PSP, Nintendo DS, Game Boy)

□ Smartphone

□ TV

1. Quais dos seguintes dispositivos eletrônicos você tem em seu quarto (você pode marcar mais de uma opção):

□ Desktop

□ Internet

□ Laptop

□ Console de videogame (Nintendo, Playstation, WII, XBOX)

□ Tablet (iPad, etc.)

□ Videogame portátil (PSP, Nintendo DS, Game Boy)

□ Smartphone

□ TV

1. Com que idade você começou a usar um computador? ___ anos □ Não lembro
2. Que tipo de computador você utiliza regularmente?

□ Nunca ou quase nunca uso um computador (caso marque esta opção, pule para a pergunta 17)

□ Desktop

□ Laptop

□ Tablet (iPad ou outro)

1. Onde você usa o computador perguntado acima? (marque apenas uma opção)

□ Meu quarto

□ Escola

□ Outro lugar em minha casa

□ Casa de amigo

□ Outro ____________

1. Quantos dias na semana você usa um computador?

- 1 dias
- 2 dias
- 3 dias
- 4 dias
- 5 dias
- 6 dias
- Todos os dias

1. Por quanto tempo você usa o computador (desktop, notebook ou laptop, tablet) de segunda a sexta-feira?

□ Não uso o computador

□ Eu uso em média ___________ horas/dia

1. Por quanto tempo você usa o computador aos sábados, domingos e feriados?

□ Não uso o computador.

□ Eu uso em média ___________ horas/dia

1. Você usa regularmente seu computador após as 22h00?

□ Não □ Sim

1. Quando você usa o computador, na maior parte das vezes você está:

□ Em pé

□ Sentado no sofá com o computador no meu colo

□ Sentando em frente a uma mesa

□ Sentado no chão

□ Sentado em minha cama com um computador no meu colo

□ Deitado

Quando você usa um desktop, responda as próximas 3 perguntas (**13 a 15**). Caso você nunca use um desktop, pule para a pergunta **16**.

1. Os pés geralmente estão:

□ Apoiados no chão

□ Suspensos

1. A tela do computador geralmente está:

□ Em frente aos seus olhos

□ Acima dos seus olhos

□ Abaixo dos seus olhos

1. O teclado do computador e mouse geralmente estão:

□ Em uma prateleira abaixo da mesa do computador

□ Na mesa onde o computador está

1. Na maior parte do tempo, você usa o computador para: _____________________________________

**JOGOS ELETRÔNICOS**

1. Você joga jogos eletrônicos?

□ Sim

□ Nunca ou quase nunca jogo jogos eletrônicos (caso marque esta opção, pule para a pergunta **27**)

1. Em que idade você começou a jogar videogames? ___ anos □ Não lembro
2. Quais plataformas de jogo você mais usa?

□ Computador ou notebook

□ Wii

□ Tablet

□ Xbox

□ Telefone celular

□ Jogos Portáteis (PSP, Nintendo DS, Game Boy)

□ Playstation

□ Outro _____________________

1. Que controles você usa pra jogar?

□ Mouse

□ Tela sensível ao toque

□ Trackball

□ Corpo (tipo tapete de dança, kinect ou controles interativos do Wii)

□ Controle do videogame

□ Outro________________

1. Quando você joga jogos eletrônicos, você geralmente está:

□ Em pé

□ Sentado no sofá

□ Sentando em frente a uma mesa

□ Sentado no chão

□ Sentado em uma cadeira ou poltrona

□ Deitado

□ Sentado na cama

1. Onde você mais joga jogos eletrônicos?

□ Minha casa

□ Casa de amigo

□ Escola

□ Outro ___________________

1. Com quem frequência você joga jogos eletrônicos em uma semana?

- 1 dia
- 2 dias
- 3 dias
- 4 dias
- 5 dias
- 6 dias
- Todos os dias

1. Por quanto tempo você joga jogos eletrônicos de segunda a sexta-feira?

□ Não jogo

□ Eu jogo em média ___________ horas/dia

1. Por quanto tempo você joga jogos eletrônicos aos sábados, domingos e feriados?

□ Não jogo

□ Eu jogo em média ___________ horas/dia

1. Você joga regularmente jogos eletrônicos após as 22h00?

□ Não □ Sim

**INTERNET**

1. Com quantos anos você começou a usar a internet? ___ anos

□ Não lembro

1. Você tem acesso à internet?

□ Sim

□ Nunca ou quase nunca acesso a internet (caso você marque esta opção, pule para a pergunta 35).

1. Em quantos dias na semana você usa a internet?

□ 1 dia

□ 2 dias

□ 3 dias

□ 4 dias

□ 5 dias

□ 6 dias

□ Todos os dias

1. Que dispositivo eletrônico você mais usa para acessar a internet?

□ Desktop

□ Tablet

□ Laptop

□ Celular

□ Outro ____________________________

1. Onde você mais acessa a internet?

□ Minha casa

□ Escola

□ Na rua

□ Casa de amigos

□ Outros ___________________

1. Você geralmente acessa a internet depois das 22h00?

□ Não

□ Sim

1. Por quanto tempo você fica conectado à internet de segunda a sexta-feira?

□ Não acesso

□ Fico conectado em média ___________ horas/dia

1. Por quanto tempo você fica conectado à internet aos sábados, domingos e feriados?

□ Não acesso

□ Fico conectado em média ___________ horas/dia

**USO DE TELEFONE CELULAR**

1. Você tem celular?

□ Sim

□ Não. Caso marque esta opção, pule para a pergunta 41

1. Com quantos anos você teve seu primeiro celular? _____ anos

□ Não lembro

1. Quais são suas opções quando usa um celular?

□ Mandar ou receber mensagens ou WhatsApp

□ Ouvir música

□ Acessar a internet

□ Jogar

□ Assistir a vídeos

□ Acessar redes sociais

□ Tirar fotos

□ Outro _______________________

1. Por quanto tempo você usa seu celular de segunda a sexta-feira?

□ Não uso celular

□ Uso celular em média por _________ horas/dia

1. Por quanto tempo você usa seu celular aos sábados e domingos?

□ Não uso celular

□ Uso celular em média por _________ horas/dia

1. Você usa seu celular depois das 22h00?

□ Não

□ Sim

**ASSISTIR TELEVISÃO**

1. Por quanto tempo você assiste à televisão de segunda a sexta-feira?

□ Não assisto TV

□ Assisto em média ___________ horas/dia

1. Por quanto tempo você assiste à televisão aos sábados, domingos e feriados?

□ Não assisto TV

□ Assisto em média ___________ horas/dia

1. Você geralmente assiste à TV depois das 22h00?

□ Não

□ Sim

**USO SIMULTÂNEO DE DOIS OU MAIS DISPOSITIVOS ELETRÔNICOS**

1. Quais dispositivos eletrônicos você usa com mais frequência ao mesmo tempo?

□ Desktop

□ Tablet

□ Celular

□ Laptop

□ Jogos eletrônicos

□ TV

**PRESENÇA DE DOR MUSCOESQUELÉTICA (MÚSCULOS, OSSOS OU ARTICULAÇÕES)**

1. Você tem uma doença crônica?

□ Não

□ Sim

Em caso afirmativo, qual(is) doença(s)? ______________________

Respostas relacionadas a DOR nos ÚLTIMOS TRÊS MESES. Não considere dor resultante de batidas, quedas ou hematomas.

1. Você teve alguma dor nos músculos, ossos ou articulações nos últimos três meses?

□ Sim

□ Não

1. Quais partes do corpo doeram nos últimos três meses? (você pode marcar mais de uma opção)

□ Pescoço

□ Pulsos e mãos

□ Quadril, pernas e pés

□ Ombros e braços

□ Costas

1. Quais partes do corpo doeram ao usar um computador nos últimos três meses? (você pode marcar mais de uma opção)

□ Pescoço

□ Costas

□ Ombros e braços

□ Quadril, pernas e pés

□ Pulsos e mãos

□ Sem dor

1. Quais partes do corpo doeram ao jogar jogos eletrônicos nos últimos três meses? (você pode marcar mais de uma opção)

□ Pescoço

□ Costas

□ Ombros e braços

□ Quadril, pernas e pés

□ Pulsos e mãos

□ Sem dor

1. Quais partes do corpo doeram ao jogar jogos eletrônicos nos últimos três meses? (você pode marcar mais de uma opção)

□ Pescoço

□ Pulsos e mãos

□ Quadril, pernas e pés

□ Ombros e braços

□ Costas

**51.** Marque na imagem abaixo em quais partes do corpo você sente dor

**TRABALHO**

1. Você trabalha?

□ Não

□ Sim

Qual é o seu trabalho? _________________________________________________

Quantas horas por dia você trabalha? ________________________________
